# Supplementary material for: Comparative Effectiveness of Personalized Lifestyle Management Strategies for Cardiovascular Disease Risk Reduction
Source: PubMed Central journal article supplement — J Am Heart Assoc. 2016 Mar 29;5(3):e002737. doi: 10.1161/JAHA.115.002737 (PMC4943251; doi:10.1161/jaha.115.002737), 2016-03-29
Supplement: JAH3-5-e002737-s001.pdf [file JAH3-5-e002737-s001.pdf]

## SUPPLEMENTAL MATERIAL

### Data S1. Risk equation calculation

Example of individual 10 year CVD risk calculation with and without interventions

The hypothetical profile is profile 3 in Table 3, a white 45 year-old male with total cholesterol of 200 mg/dL, HDL-C of 40 mg/dL, and a treated systolic blood pressure of 160 mmHg. Regression coefficients are based on those published in Goff et al. (2013).

#### General equation without intervention for smokers:

$$1 - S_{10} * \exp[12.344 \ln(\text{age}) + 1.797 \ln(\text{SBP}) + 11.853 \ln(\text{TC}) - 7.99 \ln(\text{HDL}) + 7.837y - 2.664 \ln(\text{age}) \ln(\text{TC}) + 1.769 \ln(\text{age}) \ln(\text{HDL}) - 1.795 \ln(\text{age}) - 61.18]$$

where  $S_{10}$  is the baseline survival rate at 10 years, or 0.9144 and  $y$  is 1 for smoking and 0 for not smoking

Plugging in numbers gives

$$\begin{aligned} 1 - 0.9144 * \exp[12.344 \ln(45) + 1.797 \ln(160) + 11.853 \ln(200) - 7.99 \ln(40) \\ + 7.837(1) - 2.664 \ln(45) \ln(200) + 1.769 \ln(45) \ln(40) - 1.795 \ln(45) \\ - 61.18] \\ = 12.17\% \text{ risk} \end{aligned}$$

This is the baseline 10-year CVD risk.

#### With group therapy smoking cessation:

$$1 - S_{10} \exp[12.344 \ln(\text{age}) + 1.797 \ln(\text{SBP}) + 11.853 \ln(\text{TC}) - 7.99 \ln(\text{HDL}) + 7.837y - 2.664 \ln(\text{age}) \ln(\text{TC}) + 1.769 \ln(\text{age}) \ln(\text{HDL}) - 1.795 \ln(\text{age}) - 61.18]$$

Plugging in numbers gives

$$\begin{aligned} 1 - S_{10} \exp[12.344 \ln(45) + 1.797 \ln(160) + 11.853 \ln(200) - 7.99 \ln(40) + 7.837(0) \\ - 2.664 \ln(45) \ln 200 + 1.769 \ln(45) \ln(40) - 1.795 \ln(45) - 61.18] \\ = 4.64\% \text{ risk} \end{aligned}$$

This is the baseline risk for a non-smoker with the same clinical profile. Note that the value 7.837 is multiplied by 0 for a non-smoker and disappears in the equation.

The potential gain in risk reduction from becoming a non-smoker is  $12.17\% - 4.64\% = 7.53\%$

However, not everyone who attempts to quit smoking will succeed. Based on published literature, with an unaided quit probability of 0.050 and a relative risk of 1.98, the probability of quitting with group therapy is 0.099, or 9.9%.

Thus, based on intention-to-treat calculations, the risk reduction for group therapy with smoking is

$$(0.099 - 0.050) * 7.53\% = 0.37\%$$

**The general equation with the other interventions:**

$$1 - S_{10} * \exp[12.344 \ln(\text{age}) + 1.797 \ln(\text{SBP} + \text{SBP change}) + 11.853 \ln(\text{TC} + \text{TC change}) - 7.99 \ln(\text{HDL} + \text{HDL change}) + 7.837y - 2.664 \ln(\text{age}) \ln(\text{TC} + \text{TC change}) + 1.769 \ln(\text{age}) \ln(\text{HDL} + \text{HDL change}) - 1.795 \ln(\text{age}) - 61.18]$$

**With Mediterranean diet:**

$$1 - 0.9144 * \exp[12.344 \ln(45) + 1.797 \ln(160 - 1.70) + 11.853 \ln(200 - 7.35) - 7.99 \ln(40 + 0.94) + 7.837(1) - 2.664 \ln(45) \ln(200 - 7.35) + 1.769 \ln(45) \ln(40 + 0.94) - 1.795 \ln(45) - 61.18] = 10.95\% \text{ risk}$$

**With walking as aerobic exercise:**

$$1 - 0.9144 * \exp[12.344 \ln(45) + 1.797 \ln(160 - 3.80) + 11.853 \ln(200 - 3.48) - 7.99 \ln(40 + 2.32) + 7.837(1) - 2.664 \ln(45) \ln(200 - 3.48) + 1.769 \ln(45) \ln(40 + 2.32) - 1.795 \ln(45) - 61.18] = 10.62\% \text{ risk}$$

**With yoga:**

$$1 - 0.9144 * \exp[12.344 \ln(45) + 1.797 \ln(160 - 4.45) + 11.853 \ln(200 - 17) - 7.99 \ln(40 + 2.87) + 7.837(1) - 2.664 \ln(45) \ln(200 - 17) + 1.769 \ln(45) \ln(40 + 2.87) - 1.795 \ln(45) - 61.18] = 9.25\% \text{ risk}$$

**Table S1. Alternative estimates for effectiveness of lifestyle interventions on reducing CVD risk through changes in risk factors**

| <b>Impact of Lifestyle Changes on Risk Factor due to Interventions</b> |                                                       |                                   |                                 |                                   |
|------------------------------------------------------------------------|-------------------------------------------------------|-----------------------------------|---------------------------------|-----------------------------------|
| <b>Risk factor</b>                                                     | <b>Physician advice<br/>for smoking<br/>cessation</b> | <b>Mediterranean<br/>diet</b>     | <b>Aerobic exercise</b>         | <b>Yoga</b>                       |
| Smoking (% quitting)                                                   | 8.30*<br>(7.10, 9.70)<br>(28)                         | --                                | --                              | --                                |
| Systolic blood pressure (mmHg)                                         | --                                                    | -1.70<br>(-3.35, -0.05)<br>(29)   | -3.84<br>(-4.97, -2.72)<br>(34) | -5.85<br>(-8.81, -2.89)<br>(25)   |
| Total cholesterol (mg/dl)                                              | --                                                    | -6.19‡<br>(-10.05, -2.32)<br>(32) | 1.16<br>(-9.28, 11.99)<br>(33)  | -13.09<br>(-19.60, -6.59)<br>(25) |
| HDL cholesterol (mg/dl)                                                | --                                                    | 0.94<br>(-1.93, 3.82)<br>(29)     | 2.32<br>(1.16, 3.87)<br>(33)    | 2.94<br>(0.57, 5.31)<br>(25)      |

\* Probability of quitting smoking with physical advice compared to quitting without intervention. Assume same unassisted rate as base case (5%) (28). The relative proportion of quitting (relative risk) is 1.66 for physician advice versus control (95% CI: 1.42-1.94) (31).

‡ Only this parameter was changed due to data availability.

**Figure S1. Sensitivity analysis with alternate meta-analyses, shown by hypothetical profile (y-axes represent 10-year CVD risk, x-axes represent interventions). Note that the optimal intervention with the lowest 10-year risk with the alternate estimates (red and purple bars) remains the same as that in the base-case (blue and green bars) for each profile and race.**

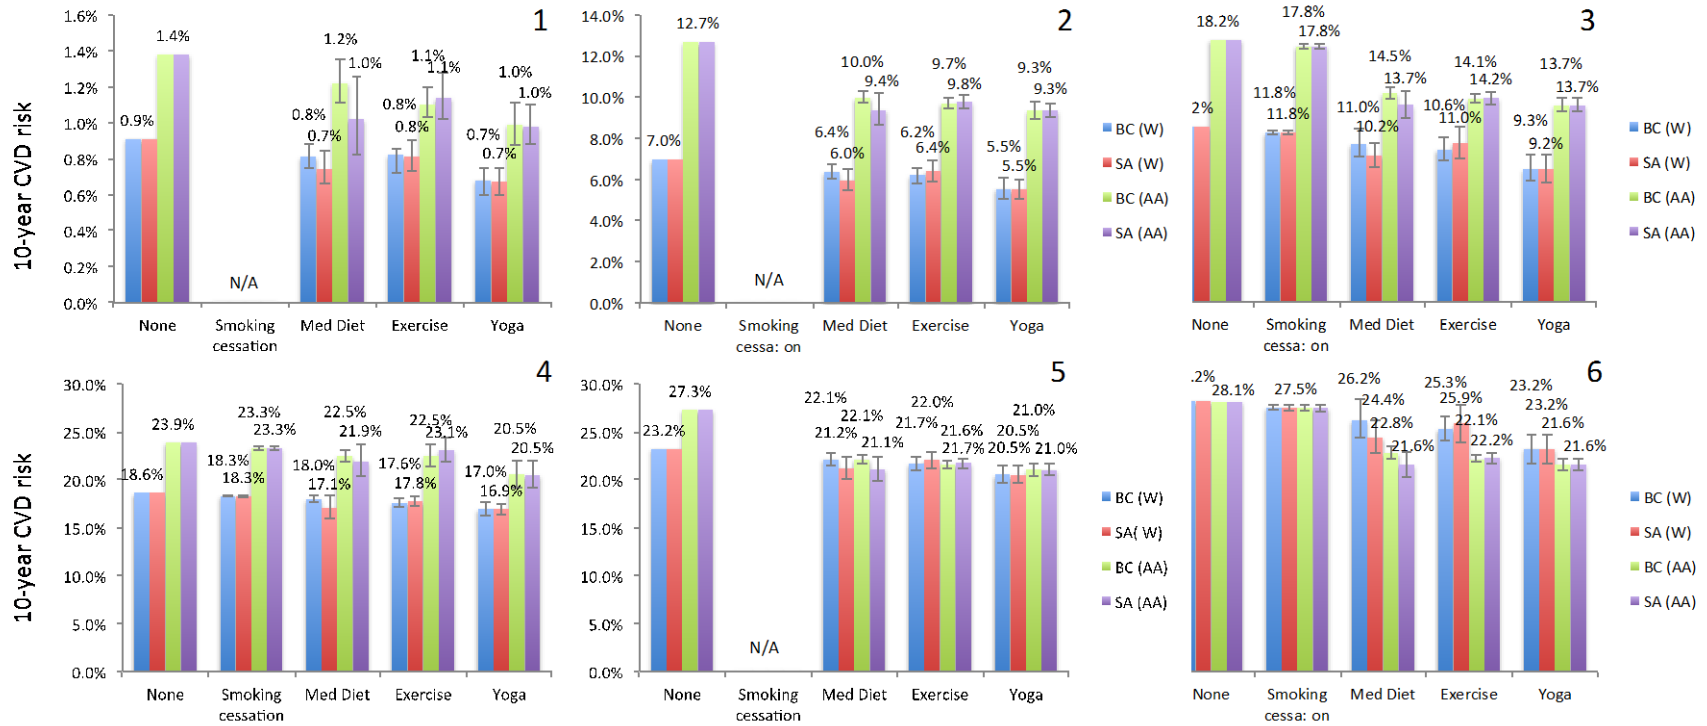

Abbreviations: CVD: cardiovascular disease, Med diet: Mediterranean diet, BC: base case, SA: sensitivity analysis, W: white, AA: African-American, N/A: not applicable

**Figure S2. Sensitivity analysis with Framingham risk equations, shown by hypothetical profile (y-axes represent 10-year CVD risk, x-axes represent interventions). Note that the optimal intervention with the lowest 10-year risk with the Framingham equations (red bars) remains the same as that in the base-case (blue and green bars) for each profile.**

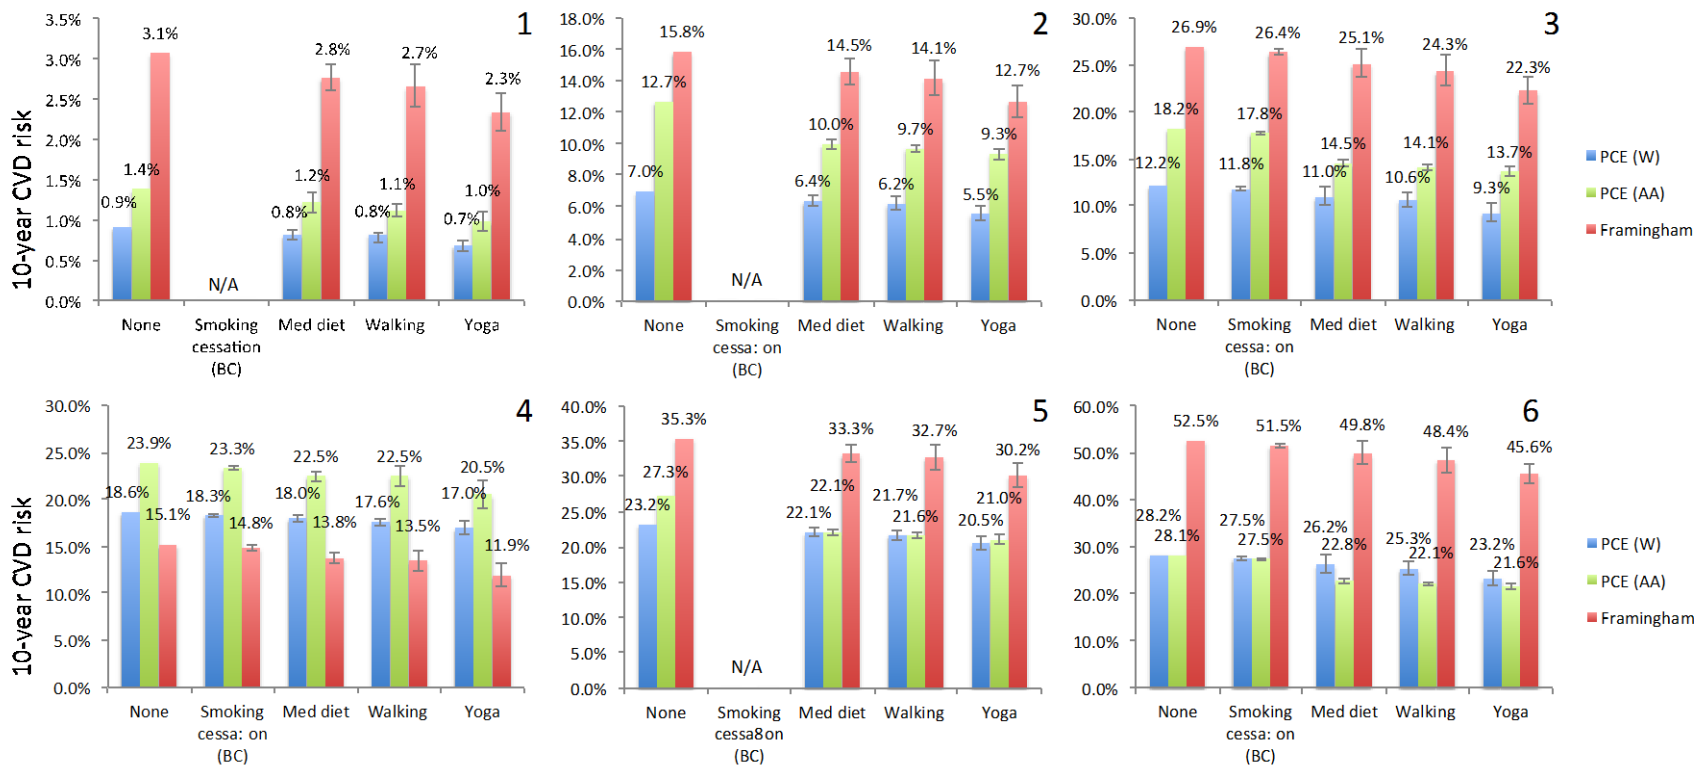

Abbreviations: CVD: cardiovascular disease, Med diet: Mediterranean diet, PCE: Pooled Cohort Equations, W: white, AA: African-American, N/A: not applicable
